# Supplementary material for: Sensory and Olfactometry Chemometrics as Valuable Tools for Assessing Hops’ Aroma Impact on Dry-Hopped Beers: A Study with Wild Portuguese Genotypes
Source: MDPI journal article supplement (doi:10.3390/foods10061397), 2021-06-17
Supplement: s1 [file s1]

## Appendix A

**Supplementary Table S1.** Sum of significant attributes tables across assessor from sensory analysis of Portuguese hops performed by Check-All-That-Apply (CATA) test.

| Hops | Citrus fruits | Non-citrus fruits | Resinous | Earthy | Floral | Sulphurous |
|------|---------------|-------------------|----------|--------|--------|------------|
| PT01 | 7             | 10                | 7        | 2      | 6      | 9          |
| PT02 | 6             | 8                 | 14       | 8      | 4      | 5          |
| PT03 | 4             | 9                 | 15       | 3      | 7      | 5          |
| PT04 | 7             | 12                | 13       | 3      | 8      | 1          |
| PT05 | 5             | 8                 | 17       | 8      | 5      | 6          |
| PT06 | 6             | 10                | 16       | 4      | 6      | 3          |
| PT07 | 3             | 2                 | 17       | 9      | 4      | 5          |
| PT08 | 8             | 9                 | 14       | 3      | 6      | 11         |
| PT09 | 4             | 12                | 16       | 5      | 8      | 3          |
| PT10 | 3             | 11                | 15       | 3      | 8      | 3          |
| PT11 | 8             | 15                | 14       | 4      | 9      | 3          |
| PT12 | 8             | 12                | 10       | 2      | 6      | 9          |
| PT13 | 5             | 10                | 15       | 6      | 8      | 5          |
| PT14 | 17            | 18                | 10       | 0      | 16     | 5          |
| PT15 | 9             | 13                | 10       | 1      | 10     | 9          |

**Supplementary Table S2.** Squared cosines of the main components (Factor 1 to 3) compounds (variables) and hops sample (observations), obtained by Principal Component Analysis (PCA) of GC-O results.

| PCA of sensory attributes and compounds content of dry-hopped beers (Figure 3) | F1           | F2           | F3           |
|--------------------------------------------------------------------------------|--------------|--------------|--------------|
| Ethyl 2-methylpropanoate                                                       | <b>0.883</b> | 0.064        | 0.053        |
| Ethyl 2-methylbutanoate                                                        | 0.092        | <b>0.833</b> | 0.075        |
| Ethyl 3-methylbutanoate                                                        | 0.094        | <b>0.884</b> | 0.022        |
| Ethyl 4-methylpentanoate                                                       | 0.306        | <b>0.673</b> | 0.021        |
| Dimethyl trisulphide                                                           | <b>0.667</b> | 0.320        | 0.012        |
| Myrcene                                                                        | <b>0.987</b> | 0.013        | 0.000        |
| 3-Methylbutyl 2-methylpropanoate                                               | <b>0.527</b> | 0.429        | 0.045        |
| 2-Methylbutyl 2-methylpropanoate                                               | <b>0.654</b> | 0.318        | 0.028        |
| S-Methyl 5-methylpentanthioate                                                 | <b>0.686</b> | 0.313        | 0.001        |
| S-Methyl thiohexanoate                                                         | 0.423        | <b>0.577</b> | 0.000        |
| Linalool                                                                       | <b>0.963</b> | 0.006        | 0.031        |
| Geraniol                                                                       | 0.041        | <b>0.927</b> | 0.031        |
| Geranyl acetate                                                                | <b>0.590</b> | 0.059        | 0.351        |
| $\beta$ -Caryophyllene                                                         | <b>0.712</b> | 0.276        | 0.013        |
| Ethyl cinnamate                                                                | 0.120        | <b>0.813</b> | 0.067        |
| $\alpha$ -Humulene                                                             | 0.433        | <b>0.561</b> | 0.006        |
| Humulene oxide                                                                 | 0.167        | 0.404        | <b>0.429</b> |
| Citrus fruits                                                                  | <b>0.923</b> | 0.043        | 0.034        |
| Non-citrus fruits                                                              | <b>0.770</b> | 0.196        | 0.033        |
| Spicy                                                                          | <b>0.749</b> | 0.135        | 0.116        |
| PT05                                                                           | <b>0.708</b> | 0.075        | 0.217        |
| PT11                                                                           | 0.247        | <b>0.732</b> | 0.021        |
| PT14                                                                           | <b>0.612</b> | 0.380        | 0.007        |
| PT15                                                                           | <b>0.684</b> | 0.199        | 0.117        |
| liking                                                                         | <b>0.774</b> | 0.096        | 0.130        |

The results corresponding to the supplementary variables and observations are displayed in the second part of the table. Values in bold correspond for each observation to the factor for which the squared cosine is the largest.

**Supplementary Table S3.** Odour-active compounds of Portuguese wild hops. Identification and intensity determination by olfactometry (GC-O) with the method of aroma intensity.

| Ri <sup>a</sup>        | Compound                              | Odour descriptors                   | PT01 | PT02 | PT03 | PT04 | PT05 | PT06 | PT07 | PT08 | PT09 | PT10 | PT11 | PT12 | PT13 | PT14 | PT15 |
|------------------------|---------------------------------------|-------------------------------------|------|------|------|------|------|------|------|------|------|------|------|------|------|------|------|
| Aldehydes              |                                       |                                     |      |      |      |      |      |      |      |      |      |      |      |      |      |      |      |
| 644                    | 3-Methylbutanal <sup>+</sup>          | Fruity, green fruit                 | 0.0  | 0.0  | 0.0  | 0.0  | 0.0  | 0.0  | 0.0  | 0.0  | 0.0  | 0.0  | 0.0  | 0.0  | 1.0  | 1.0  | 0.5  |
| 652                    | 2-Methylbutanal <sup>+</sup>          | Fruity, green fruit                 | 0.5  | 0.0  | 0.0  | 0.0  | 0.0  | 0.0  | 0.5  | 0.0  | 0.0  | 0.0  | 0.0  | 0.0  | 0.0  | 2.0  | 0.5  |
| 801                    | Hexanal <sup>+</sup>                  | Green grassy                        | 0.0  | 0.0  | 0.0  | 0.0  | 0.0  | 0.0  | 0.0  | 0.0  | 0.0  | 0.0  | 0.0  | 0.0  | 0.0  | 1.0  | 0.0  |
| Carboxylic acids       |                                       |                                     |      |      |      |      |      |      |      |      |      |      |      |      |      |      |      |
| 741                    | 2-Methylpropanoic acid                | Fruity, rancid, cheese              | 0.0  | 0.0  | 0.0  | 0.0  | 0.0  | 0.0  | 0.5  | 0.5  | 0.0  | 0.0  | 0.0  | 0.0  | 0.5  | 1.0  | 0.0  |
| 831                    | 3-Methylbutanoic acid                 | Rancid, cheese                      | 3.0  | 1.0  | 2.5  | 0.5  | 2.5  | 2.5  | 3.0  | 2.5  | 1.5  | 1.0  | 1.0  | 0.5  | 2.5  | 3.0  | 0.5  |
| 843                    | 2-Methylbutanoic acid                 | Fruity, rancid, cheese              | 0.5  | 0.0  | 0.5  | 0.5  | 1.0  | 0.0  | 0.0  | 0.0  | 1.0  | 0.7  | 1.0  | 2.5  | 1.0  | 1.0  | 0.5  |
| Esters                 |                                       |                                     |      |      |      |      |      |      |      |      |      |      |      |      |      |      |      |
| 678                    | Methyl 2-methylpropanoate             | Fruity, tropical fruit              | 0.0  | 0.0  | 0.0  | 0.0  | 0.0  | 0.5  | 0.0  | 0.5  | 0.5  | 0.0  | 0.0  | 0.0  | 0.5  | 1.0  | 0.0  |
| 753                    | Ethyl 2-methylpropanoate <sup>+</sup> | Fruity, sweet fruit                 | 0.0  | 1.0  | 0.0  | 0.0  | 0.5  | 0.5  | 0.0  | 0.0  | 0.0  | 0.3  | 1.0  | 0.5  | 0.0  | 1.0  | 1.0  |
| 774                    | Methyl 2-methylbutanoate              | Fruity, green fruit                 | 2.0  | 1.0  | 1.0  | 1.0  | 1.5  | 1.0  | 1.0  | 2.0  | 1.0  | 0.3  | 1.5  | 1.0  | 1.5  | 1.5  | 1.0  |
| 848                    | Ethyl-2-methylbutanoate <sup>+</sup>  | Fruity, tropical fruit              | 1.0  | 0.0  | 0.0  | 0.0  | 0.0  | 0.0  | 0.0  | 0.0  | 1.0  | 0.0  | 0.5  | 1.0  | 0.0  | 1.0  | 0.5  |
| 889                    | Methyl 4-methylpentanoate             | Fruity, sweet fruit, tropical fruit | 0.0  | 0.0  | 0.0  | 0.0  | 0.0  | 0.0  | 0.5  | 0.5  | 0.0  | 0.0  | 0.0  | 0.5  | 0.0  | 0.0  | 0.0  |
| 964                    | Ethyl 4-methylpentanoate <sup>+</sup> | Fruity, sweet fruit, tropical fruit | 1.0  | 1.0  | 0.0  | 1.0  | 1.0  | 1.0  | 1.0  | 1.5  | 1.0  | 1.0  | 1.0  | 2.0  | 0.0  | 2.0  | 1.0  |
| 1062                   | Methyl 2-methylheptanoate             | Fruity, tropical fruit              | 0.0  | 0.0  | 0.0  | 0.0  | 0.5  | 0.0  | 0.0  | 0.0  | 0.0  | 0.0  | 0.5  | 0.0  | 0.0  | 1.0  | 0.5  |
| 1182                   | Methyl phenylacetate                  | Honey, floral, sweet-like, fruity   | 0.5  | 0.5  | 0.0  | 0.0  | 0.5  | 0.0  | 0.0  | 1.0  | 0.0  | 0.3  | 1.0  | 0.0  | 0.0  | 1.0  | 0.0  |
| Higher alcohols        |                                       |                                     |      |      |      |      |      |      |      |      |      |      |      |      |      |      |      |
| 868                    | 3-Hexenol <sup>+</sup>                | Green grassy                        | 0.0  | 0.0  | 0.0  | 0.0  | 1.0  | 0.0  | 0.0  | 0.0  | 0.0  | 0.0  | 1.0  | 0.0  | 0.0  | 1.0  | 0.5  |
| 980                    | 1-Octen-3-ol <sup>+</sup>             | Mushroom, earthy                    | 1.0  | 1.0  | 1.5  | 1.0  | 1.0  | 0.5  | 0.5  | 1.0  | 0.5  | 0.3  | 1.0  | 1.0  | 0.0  | 0.0  | 1.0  |
| Ketone                 |                                       |                                     |      |      |      |      |      |      |      |      |      |      |      |      |      |      |      |
| 545                    | Diacetyl <sup>+</sup>                 | Rancid                              | 0.0  | 0.0  | 0.0  | 0.0  | 0.0  | 0.0  | 0.0  | 0.0  | 0.5  | 0.3  | 0.0  | 0.0  | 0.0  | 0.5  | 0.0  |
| Monoterpenes           |                                       |                                     |      |      |      |      |      |      |      |      |      |      |      |      |      |      |      |
| 991                    | Myrcene <sup>+</sup>                  | Herbal, resinous, spicy             | 1.0  | 2.5  | 2.5  | 3.0  | 3.0  | 2.5  | 3.0  | 3.0  | 1.0  | 2.7  | 2.5  | 3.0  | 2.5  | 2.5  | 1.0  |
| 1036                   | Limonene <sup>+</sup>                 | Citrus, fruity                      | 0.0  | 0.0  | 0.0  | 0.0  | 1.0  | 0.5  | 0.0  | 0.5  | 0.0  | 0.0  | 0.5  | 0.0  | 0.0  | 0.5  | 0.5  |
| 1050                   | Ocimene                               | Citrus, fruity, herbal              | 0.0  | 0.0  | 0.0  | 0.0  | 0.0  | 0.0  | 0.0  | 0.0  | 0.0  | 0.3  | 0.0  | 0.0  | 0.0  | 2.0  | 0.0  |
| Monoterpenoid alcohols |                                       |                                     |      |      |      |      |      |      |      |      |      |      |      |      |      |      |      |

|                          |                                              |                                                     |     |     |     |     |     |     |     |     |     |     |     |     |     |     |     |
|--------------------------|----------------------------------------------|-----------------------------------------------------|-----|-----|-----|-----|-----|-----|-----|-----|-----|-----|-----|-----|-----|-----|-----|
| 1099                     | Linalool <sup>+</sup>                        | Floral, citrus, fruity                              | 3.0 | 2.5 | 2.5 | 1.0 | 2.0 | 1.5 | 3.0 | 2.5 | 2.5 | 2.7 | 2.5 | 2.5 | 2.5 | 3.0 | 1.0 |
| 1257                     | Geraniol <sup>+</sup>                        | Floral, citrus, fruity                              | 1.0 | 0.5 | 2.0 | 1.0 | 1.0 | 1.0 | 2.0 | 0.5 | 1.0 | 2.3 | 1.0 | 1.0 | 1.0 | 1.5 | 1.0 |
| <i>Thioesters</i>        |                                              |                                                     |     |     |     |     |     |     |     |     |     |     |     |     |     |     |     |
| 798                      | S-methyl propanthioate                       | Sulphurous                                          | 0.0 | 0.0 | 0.0 | 0.0 | 0.0 | 0.0 | 0.0 | 0.0 | 0.5 | 0.0 | 1.0 | 0.0 | 0.0 | 0.0 | 0.0 |
| 849                      | S-methyl 2-methylpropanthioate               | Sulphurous                                          | 0.0 | 0.0 | 0.0 | 0.5 | 0.0 | 0.0 | 0.0 | 0.0 | 0.0 | 0.0 | 0.0 | 0.0 | 0.0 | 0.0 | 0.0 |
| 941                      | S-methyl 2-methylbutanthioate                | Sulphurous, fruity Sweet, tropical, and green fruit | 3.0 | 1.0 | 0.5 | 1.5 | 0.5 | 0.0 | 1.0 | 1.0 | 2.5 | 0.7 | 1.0 | 1.5 | 0.5 | 1.0 | 0.5 |
| 1059                     | S-methyl 4-methylpentanoate <sup>+</sup>     | Sulphurous, garlic, onion, cooked vegetable         | 0.5 | 2.5 | 0.5 | 1.0 | 1.0 | 0.5 | 1.5 | 1.0 | 1.0 | 1.0 | 1.0 | 0.5 | 0.5 | 0.0 | 0.5 |
| 1093                     | S-methyl hexanthioate <sup>+</sup>           | Sulphurous, garlic, onion, cooked vegetable         | 0.0 | 0.5 | 0.5 | 0.5 | 2.0 | 0.0 | 1.0 | 0.5 | 1.0 | 2.0 | 0.0 | 1.0 | 0.0 | 1.5 | 1.0 |
| 1168                     | S-methyl 5-methylhexanthioate                | Sulphurous, garlic, onion, cooked vegetable         | 0.0 | 0.0 | 0.5 | 0.0 | 1.0 | 0.5 | 0.0 | 0.0 | 0.0 | 0.7 | 0.5 | 0.0 | 0.5 | 1.0 | 1.0 |
| 1200                     | S-methyl heptanthioate                       | Sulphurous, fruity, garlic, onion, cooked vegetable | 0.0 | 0.0 | 0.0 | 0.0 | 0.0 | 0.0 | 0.0 | 0.0 | 0.0 | 0.0 | 0.0 | 0.0 | 0.5 | 0.0 | 1.0 |
| 1213                     | S-methylthiomethyl 2-methylpropanthioate     | Sulphuro*us, garlic, onion                          | 2.5 | 1.5 | 0.0 | 2.0 | 0.5 | 2.5 | 1.5 | 2.5 | 1.0 | 0.3 | 2.0 | 2.0 | 0.5 | 0.5 | 1.0 |
| 1307                     | S-methylthiomethyl 3-methylbutanthioate      | Sulphurous, garlic, onion, earthy                   | 0.0 | 0.0 | 0.0 | 0.5 | 0.0 | 0.0 | 0.0 | 0.0 | 0.0 | 0.0 | 1.0 | 0.0 | 0.0 | 0.0 | 1.0 |
| 1309                     | S-methylthiomethyl 2-methylbutanthioate      | Sulphurous, garlic, onion, earthy                   | 2.0 | 2.0 | 0.0 | 0.5 | 1.0 | 1.0 | 1.5 | 1.5 | 1.0 | 1.0 | 2.0 | 2.0 | 0.5 | 1.0 | 3.0 |
| 1381                     | S-methyl-phenylacet thioate                  | Sulphurous, solvent                                 | 0.0 | 0.0 | 0.0 | 0.0 | 0.0 | 0.5 | 0.0 | 0.0 | 0.0 | 0.0 | 0.0 | 0.0 | 0.0 | 0.0 | 0.0 |
| 1431                     | S-methylthiomethyl 4-methylpentanthioate     | Sulphurous, garlic, onion, earthy                   | 0.0 | 1.0 | 0.0 | 0.5 | 0.0 | 2.0 | 0.0 | 1.0 | 1.0 | 0.0 | 3.0 | 0.5 | 0.5 | 0.0 | 2.5 |
| <i>Thiols/ sulphides</i> |                                              |                                                     |     |     |     |     |     |     |     |     |     |     |     |     |     |     |     |
| 400                      | Methyl mercaptan                             | Sulphurous                                          | 0.0 | 0.0 | 1.0 | 1.0 | 0.5 | 0.0 | 0.5 | 1.0 | 0.5 | 1.0 | 2.0 | 1.0 | 0.5 | 1.5 | 0.5 |
| 497                      | Dimethyl sulphide                            | Sulphurous                                          | 0.0 | 0.0 | 0.0 | 0.0 | 0.0 | 0.5 | 0.0 | 0.0 | 0.0 | 0.0 | 0.0 | 0.0 | 0.0 | 0.0 | 0.0 |
| 747                      | Dimethyl disulphide <sup>+</sup>             | Sulphurous, garlic, onion                           | 0.0 | 0.0 | 0.0 | 0.5 | 0.5 | 0.0 | 0.0 | 0.0 | 0.0 | 0.0 | 0.0 | 0.0 | 0.0 | 1.0 | 0.0 |
| 808                      | C <sub>2</sub> H <sub>4</sub> S <sub>2</sub> | Sulphurous                                          | 2.0 | 2.5 | 2.5 | 3.0 | 2.5 | 2.0 | 2.0 | 3.0 | 1.0 | 2.3 | 2.5 | 3.0 | 2.5 | 3.0 | 3.0 |
| 977                      | Dimethyl trisulphide <sup>+</sup>            | Sulphurous, garlic, onion                           | 0.5 | 1.5 | 0.5 | 1.0 | 0.5 | 1.0 | 0.5 | 0.5 | 1.0 | 2.3 | 0.5 | 1.0 | 0.0 | 0.0 | 0.5 |
| 1135                     | Trithio-2,3,5-hexane                         | Sulphurous                                          | 2.0 | 3.0 | 1.0 | 2.5 | 1.0 | 1.5 | 2.5 | 2.5 | 1.0 | 1.0 | 3.0 | 3.0 | 2.0 | 1.5 | 2.0 |
| 1538                     | Tetrathio-2,4,5,7-octane                     | Sulphurous, garlic, onion, earthy                   | 0.0 | 0.0 | 0.0 | 0.0 | 0.5 | 0.0 | 0.5 | 0.5 | 0.0 | 0.0 | 1.0 | 0.5 | 0.5 | 0.5 | 1.0 |
| 1272                     | 3-(4-Methyl-3-pentenyl)-thiophene            | Sulphurous                                          | 0.0 | 0.0 | 0.0 | 0.0 | 1.0 | 0.0 | 0.0 | 0.0 | 0.0 | 0.0 | 0.5 | 0.0 | 0.0 | 0.5 | 0.0 |

---

<sup>a</sup> calculated by linear interpolation from the retention times of the compound and adjacent n-alkanes. Compounds were identified by retention index (RI), odour descriptors, and confirmed by authentic standards (\*) and mass spectrum library. Values represent the average of analysis of two or three sniff sections.
